# Supplementary material
Source: PubMed Central journal article supplement (PMC5358355)

**SUPPLEMENTARY MATERIAL FOR:**

**Rps3/uS3 promotes mRNA binding at the 40S ribosome entry channel and stabilizes preinitiation complexes at start codons**

Jinsheng Dong, Colin E. Aitken, Anil Thakur, Byung-Sik Shin, Jon R. Lorsch, and Alan G. Hinnebusch

**Table S1. Summary of key phenotypes for Rps3 substitutions**

| Rps3 substitution | Relevant 48S PIC contacts ( $\leq 5 \text{ \AA}$ ) | Cell Growth (Slg <sup>-</sup> ) | Suppression of <i>SUI5</i> His <sup>+</sup> phenotype | Suppression of <i>SUI5</i> Slg <sup>-</sup> phenotype at 37°C | <i>HIS4-lacZ</i> UUG:AUG expression in <i>SUI5</i> cells |
|-------------------|----------------------------------------------------|---------------------------------|-------------------------------------------------------|---------------------------------------------------------------|----------------------------------------------------------|
| none (WT)         | NA <sup>1</sup>                                    | ++++                            | none (WT)                                             | -                                                             | 0.151±0.019                                              |
| K108D             | none                                               | ++++                            | strong                                                | strong                                                        | 0.039±0.006                                              |
| R116A             | mRNA                                               | -/+                             | NA <sup>2</sup>                                       | NA <sup>2</sup>                                               | ND <sup>3</sup>                                          |
| R116D             | mRNA                                               | ++++                            | moderate                                              | strong                                                        | 0.032±0.003                                              |
| R117A             | mRNA                                               | ++++                            | none                                                  | none                                                          | ND                                                       |
| R117D             | mRNA                                               | ++++                            | strong                                                | strong                                                        | 0.026±0.004                                              |
| K141A             | latch                                              | lethal                          | NA <sup>2</sup>                                       | NA <sup>2</sup>                                               | ND                                                       |
| K141D             | latch                                              | ++                              | NA <sup>2</sup>                                       | NA <sup>2</sup>                                               | ND                                                       |
| R146A             | latch/mRNA                                         | lethal                          | NA <sup>2</sup>                                       | NA <sup>2</sup>                                               | ND                                                       |
| R146D             | latch/mRNA                                         | +++                             | slight                                                | Moderate <sup>4</sup>                                         | 0.036±0.006                                              |
| K148A             | mRNA                                               | ++++                            | none                                                  | none                                                          | ND                                                       |
| K148D             | mRNA                                               | ++++                            | moderate                                              | slight                                                        | 0.026±0.004                                              |

<sup>1</sup>NA, not applicable

<sup>2</sup>NA, as suppression of the effects of *SUI5* on growth in -His medium or in +His medium at 37°C could not be scored owing to lethality (*K141A* & *R146A*) or strongly impaired growth (*R116A*) conferred by the *rps3* mutation in the absence of *SUI5* (Fig. 2B).

<sup>3</sup>ND, not determined

<sup>4</sup>Although growth of the *R146D/SUI5* strain is only slightly better than that of the WT/*SUI5* control strain on +His medium at 37°C (cf. rows 1 and row 12 in Fig. 2B), taking into account the reduced growth of the *R146D/SUI5* strain relative to the WT/*SUI5* strain at 30°C (left panel) suggests a moderate versus slight degree of suppression.

ND, not determined

**Table S2. Yeast strains employed in this work.**

| Strain | Genotype                                                                                                                                                                                                       | Source                |
|--------|----------------------------------------------------------------------------------------------------------------------------------------------------------------------------------------------------------------|-----------------------|
| H2995  | <i>MAT<math>\alpha</math> ura3-52 trp1<math>\Delta</math>-63 leu2-3,112 his4-301(ACG)</i>                                                                                                                      | (Valasek et al. 2004) |
| HD2738 | <i>MAT<math>\alpha</math> ura3-52 trp1<math>\Delta</math>-63 leu2-3,112 his4-301(ACG) P<sub>GAL</sub>-RPS3::kanMX</i>                                                                                          | This study            |
| HD2754 | <i>MAT<math>\alpha</math> ura3-52 trp1<math>\Delta</math>-63 leu2-3,112 his4-301(ACG) P<sub>GAL</sub>-RPS3::kanMX pDH412 [lc<sup>a</sup> LEU2 RPS3<sup>+</sup> in pRS315]</i>                                  | This study            |
| HD2755 | <i>MAT<math>\alpha</math> ura3-52 trp1<math>\Delta</math>-63 leu2-3,112 his4-301(ACG) P<sub>GAL</sub>-RPS3::kanMX pRS315 [lc LEU2 vector]</i>                                                                  | This study            |
| HD2765 | <i>MAT<math>\alpha</math> ura3-52 trp1<math>\Delta</math>-63 leu2-3,112 his4-301(ACG) P<sub>GAL</sub>-RPS3::kanMX pDH424 [lc LEU2 rps3-K148D in pRS315]</i>                                                    | This study            |
| HD2764 | <i>MAT<math>\alpha</math> ura3-52 trp1<math>\Delta</math>-63 leu2-3,112 his4-301(ACG) P<sub>GAL</sub>-RPS3::kanMX pDH431 [lc LEU2 rps3-K148A in pRS315]</i>                                                    | This study            |
| HD2767 | <i>MAT<math>\alpha</math> ura3-52 trp1<math>\Delta</math>-63 leu2-3,112 his4-301(ACG) P<sub>GAL</sub>-RPS3::kanMX pDH425 [lc LEU2 rps3-R116D in pRS315]</i>                                                    | This study            |
| HD2766 | <i>MAT<math>\alpha</math> ura3-52 trp1<math>\Delta</math>-63 leu2-3,112 his4-301(ACG) P<sub>GAL</sub>-RPS3::kanMX pDH432 [lc LEU2 rps3-R116A in pRS315]</i>                                                    | This study            |
| HD2769 | <i>MAT<math>\alpha</math> ura3-52 trp1<math>\Delta</math>-63 leu2-3,112 his4-301(ACG) P<sub>GAL</sub>-RPS3::kanMX pDH482 [lc LEU2 rps3-R117D in pRS315]</i>                                                    | This study            |
| HD2768 | <i>MAT<math>\alpha</math> ura3-52 trp1<math>\Delta</math>-63 leu2-3,112 his4-301(ACG) P<sub>GAL</sub>-RPS3::kanMX pDH433 [lc LEU2 rps3-R117A in pRS315]</i>                                                    | This study            |
| HD3120 | <i>MAT<math>\alpha</math> ura3-52 trp1<math>\Delta</math>-63 leu2-3,112 his4-301(ACG) P<sub>GAL</sub>-RPS3::kanMX pDH13-37 [lc LEU2 rps3K108D in pRS315]</i>                                                   | This study            |
| HD2772 | <i>MAT<math>\alpha</math> ura3-52 trp1<math>\Delta</math>-63 leu2-3,112 his4-301(ACG) P<sub>GAL</sub>-RPS3::kanMX pDH429 [lc LEU2 rps3-R146D in pRS315]</i>                                                    | This study            |
| HD2779 | <i>MAT<math>\alpha</math> ura3-52 trp1<math>\Delta</math>-63 leu2-3,112 his4-301(ACG) P<sub>GAL</sub>-RPS3::kanMX pDH430 [lc LEU2 rps3-K141D in pRS315]</i>                                                    | This study            |
| HD2836 | <i>MAT<math>\alpha</math> ura3-52 trp1<math>\Delta</math>-63 leu2-3,112 his4-301(ACG) P<sub>GAL</sub>-RPS3::kanMX pDH412 [lc LEU2 RPS3<sup>+</sup> in pRS315] p4281 [sc<sup>a</sup> TRP1 SUI5 in YCplac22]</i> | This study            |

| Strain | Genotype                                                                                                                                                                    | Source     |
|--------|-----------------------------------------------------------------------------------------------------------------------------------------------------------------------------|------------|
| HD2911 | <i>MATa ura3-52 trp1Δ-63 leu2-3,112 his4-301(ACG) P<sub>GAL</sub>-RPS3::kanMX</i> pDH412 [lc <i>LEU2 RPS3<sup>+</sup></i> in pRS315]<br>YCplac22 [sc <i>TRP1</i> vector]    | This study |
| HD2846 | <i>MATa ura3-52 trp1Δ-63 leu2-3,112 his4-301(ACG) P<sub>GAL</sub>-RPS3::kanMX</i> pDH424 [lc <i>LEU2 rps3-K148D</i> in pRS315]<br>p4281 [sc <i>TRP1 SUI5</i> in YCplac22]   | This study |
| HD2868 | <i>MATa ura3-52 trp1Δ-63 leu2-3,112 his4-301(ACG) P<sub>GAL</sub>-RPS3::kanMX</i> pDH431 [lc <i>LEU2 rps3-K148A</i> in pRS315]<br>p4281 [sc <i>TRP1 SUI5</i> in YCplac22]   | This study |
| HD2848 | <i>MATa ura3-52 trp1Δ-63 leu2-3,112 his4-301(ACG) P<sub>GAL</sub>-RPS3::kanMX</i> pDH425 [lc <i>LEU2 rps3-R116D</i> in pRS315]<br>p4281 [sc <i>TRP1 SUI5</i> in YCplac22]   | This study |
| HD2861 | <i>MATa ura3-52 trp1Δ-63 leu2-3,112 his4-301(ACG) P<sub>GAL</sub>-RPS3::kanMX</i> pDH432 [lc <i>LEU2 rps3-R116A</i> in pRS315]<br>p4281 [sc <i>TRP1 SUI5</i> in YCplac22]   | This study |
| HD2850 | <i>MATa ura3-52 trp1Δ-63 leu2-3,112 his4-301(ACG) P<sub>GAL</sub>-RPS3::kanMX</i> pDH482 [lc <i>LEU2 rps3-R117D</i> in pRS315]<br>p4281 [sc <i>TRP1 SUI5</i> in YCplac22]   | This study |
| HD2849 | <i>MATa ura3-52 trp1Δ-63 leu2-3,112 his4-301(ACG) P<sub>GAL</sub>-RPS3::kanMX</i> pDH433 [lc <i>LEU2 rps3-R117A</i> in pRS315]<br>p4281 [sc <i>TRP1 SUI5</i> in YCplac22]   | This study |
| HD3145 | <i>MATa ura3-52 trp1Δ-63 leu2-3,112 his4-301(ACG) P<sub>GAL</sub>-RPS3::kanMX</i> pDH13-37 [lc <i>LEU2 rps3-K108D</i> in pRS315]<br>p4281 [sc <i>TRP1 SUI5</i> in YCplac22] | This study |
| HD2841 | <i>MATa ura3-52 trp1Δ-63 leu2-3,112 his4-301(ACG) P<sub>GAL</sub>-RPS3::kanMX</i> pDH429 [lc <i>LEU2 rps3-R146D</i> in pRS315]<br>p4281 [sc <i>TRP1 SUI5</i> in YCplac22]   | This study |
| HD2860 | <i>MATa ura3-52 trp1Δ-63 leu2-3,112 his4-301(ACG) P<sub>GAL</sub>-RPS3::kanMX</i> pDH430 [lc <i>LEU2 rps3-K141D</i> in pRS315]<br>p4281 [sc <i>TRP1 SUI5</i> in YCplac22]   | This study |
| HD2973 | <i>MATa ura3Δ0 leu2Δ0 his3Δ0 met15Δ0 rps3Δ::kanMX</i><br>pDH459 [lc <i>URA3 RPS3<sup>+</sup></i> in pRS316]                                                                 | This study |
| HD3240 | <i>MATa ura3Δ0 leu2Δ0 his3Δ0 met15Δ0 rps3Δ::kanMX</i><br>pDH412 [lc <i>LEU2 RPS3<sup>+</sup></i> in pRS315]                                                                 | This study |

| Strain | Genotype                                                                                                | Source     |
|--------|---------------------------------------------------------------------------------------------------------|------------|
| HD3241 | <i>MATa ura3Δ0 leu2Δ0 his3Δ0 met15Δ0 rps3Δ::kanMX</i><br>pDH425 [lc <i>LEU2 rps3-R116D</i> in pRS315]   | This study |
| HD3242 | <i>MATa ura3Δ0 leu2Δ0 his3Δ0 met15Δ0 rps3Δ::kanMX</i><br>pDH482 [lc <i>LEU2 rps3-R117D</i> in pRS315]   | This study |
| HD3243 | <i>MATa ura3Δ0 leu2Δ0 his3Δ0 met15Δ0 rps3Δ::kanMX</i><br>pDH13-37 [lc <i>LEU2 rps3-K108D</i> in pRS315] | This study |
| HD3244 | <i>MATa ura3Δ0 leu2Δ0 his3Δ0 met15Δ0 rps3Δ::kanMX</i><br>pDH424 [lc <i>LEU2 rps3-K148D</i> in pRS315]   | This study |
| HD3277 | <i>MATa ura3Δ0 leu2Δ0 his3Δ0 met15Δ0 rps3Δ::kanMX</i><br>pDH429 [lc <i>LEU2 rps3-R146D</i> in pRS315]   | This study |

<sup>a</sup>lc, low copy number; sc, single copy

**Table S3. Plasmids employed in this work.**

| Plasmid  | Description                          | Source                     |
|----------|--------------------------------------|----------------------------|
| pRS315   | lc <sup>a</sup> <i>LEU2</i> vector   | (Sikorski and Hieter 1989) |
| pRS316   | lc <i>URA3</i> vector                | (Sikorski and Hieter 1989) |
| p4281    | sc <i>TRP1 TIF5-G31R</i> in YCplac22 | (Valasek et al. 2004)      |
| YCplac22 | sc <i>TRP1</i> vector                | (Gietz and Sugino 1988)    |
| pDH412   | lc <i>LEU2, RPS3</i> <sup>+</sup>    | This study                 |
| pDH459   | lc <i>URA3, RPS3</i> <sup>+</sup>    | This study                 |
| pDH424   | lc <i>LEU2, rps3-K148D</i>           | This study                 |
| pDH431   | lc <i>LEU2, rps3-K148A</i>           | This study                 |
| pDH425   | lc <i>LEU2, rps3-R116D</i>           | This study                 |
| pDH432   | lc <i>LEU2, rps3-R116A</i>           | This study                 |
| pDH482   | lc <i>LEU2, rps3-R117D</i>           | This study                 |
| pDH433   | lc <i>LEU2, rps3-R117A</i>           | This study                 |
| pDH13-37 | lc <i>LEU2, rps3-K108D</i>           | This study                 |
| pDH429   | lc <i>LEU2, rps3-R146D</i>           | This study                 |
| pDH430   | lc <i>LEU2, rps3-K141D</i>           | This study                 |
| p3218    | pFA6a-kanMX6-PGAL1                   | (Longtine et al. 1998)     |
| p367     | sc <i>URA3 HIS4(ATG)-lacZ</i>        | (Donahue and Cigan 1988)   |

| Plasmid | Description                   | Source                      |
|---------|-------------------------------|-----------------------------|
| p391    | sc <i>URA3 HIS4(TTG)-lacZ</i> | (Donahue and Cigan 1988)    |
| pPMB24  | sc <i>URA3 SUI1-lacZ</i>      | (Martin-Marcos et al. 2011) |
| pPMB25  | sc <i>URA3 SUI1-opt-lacZ</i>  | (Martin-Marcos et al. 2011) |

<sup>a</sup>lc, low copy number; sc, single copy.

**Table S4. Primers used for mutagenesis (with mutated nucleotides underlined).**

| Primer       | Sequence (5' to 3')                               | Mutation     |
|--------------|---------------------------------------------------|--------------|
| RPS3-K148D   | CTAAGAGCTGCCAGAGCT <u>GAT</u> GCTATGAAATTTGCTGAC  | <i>K148D</i> |
| RPS3-K148D-r | GTCAGCAAATTTTCATAGC <u>ATC</u> AGCTCTGGCAGCTCTTAG | <i>K148D</i> |
| RPS3-K148A   | CTAAGAGCTGCCAGAGCT <u>GCT</u> GCTATGAAATTTGCTGAC  | <i>K148A</i> |
| RPS3-K148A-r | GTCAGCAAATTTTCATAGC <u>AGC</u> AGCTCTGGCAGCTCTTAG | <i>K148A</i> |
| RPS3-R116D   | GAACGGTTTGGCTATC <u>GAT</u> AGAGCTGCTTACGGTGTCG   | <i>R116D</i> |
| RPS3-R116D-r | CGACACCGTAAGCAGCTCT <u>ATC</u> GATAGCCAAACCGTTC   | <i>R116D</i> |
| RPS3-R116A   | GAACGGTTTGGCTATC <u>GCT</u> AGAGCTGCTTACGGTGTCG   | <i>R116A</i> |
| RPS3-R116A-r | CGACACCGTAAGCAGCTCT <u>AGC</u> GATAGCCAAACCGTTC   | <i>R116A</i> |
| RPS3-R117A   | GGTTTGGCTATCAGAG <u>CTG</u> CTGCTTACGGTGTCGTCAG   | <i>R117A</i> |
| RPS3-R117A-r | CTGACGACACCGTAAGCAGC <u>AGCT</u> CTGATAGCCAAACC   | <i>R117A</i> |
| RPS3-R117D   | GGTTTGGCTATCAGAG <u>ATG</u> CTGCTTACGGTGTCGTCAG   | <i>R117D</i> |
| RPS3-R117D-r | CTGACGACACCGTAAGCAGC <u>ATCT</u> CTGATAGCCAAACC   | <i>R117D</i> |
| RPS3-K108D   | GCTGAATCTATGAAATTC <u>GAT</u> TTGTTGAACGGTTTGGC   | <i>K108D</i> |
| RPS3-K108D-r | GCCAAACCGTTCAACAA <u>ATC</u> GAATTTTCATAGATTCAGC  | <i>K108D</i> |
| RPS3-R146D   | GGTAAACTAAGAGCTGCC <u>GAT</u> GCTAAGGCTATGAAATTT  | <i>R146D</i> |
| RPS3-R146D-r | AAATTTTCATAGCCTTAGC <u>ATC</u> GGCAGCTCTTAGTTTACC | <i>R146D</i> |
| RPS3-K141D   | GAAGTTGTTGTTTCCGGT <u>GAT</u> CTAAGAGCTGCCAGAGCT  | <i>K141D</i> |
| RPS3-K141D-r | AGCTCTGGCAGCTCTTAG <u>ATC</u> ACCGGAAACAACAACCTTC | <i>K141D</i> |



**Figure S1. *RPS3* alleles do not significantly alter 40S:60S subunit ratios.**

*rps3Δ::kanMX* deletion strains harboring plasmid-borne WT *RPS3*<sup>+</sup> (HD3240) or *rps3* alleles *R116D* (HD3241), *R117D* (HD3242), *K108D* (HD3243), *K148D* (HD3244) or *R146D* (HD3277) were grown in YPD medium to A<sub>600</sub> ~1, and WCEs prepared in the absence of Mg<sup>+2</sup> were resolved by velocity sedimentation through 5 to 30% sucrose gradients and scanned at 254 nm. Mean (± S.E.M.) 40S/60S subunit ratios calculated from three biological replicates are indicated. Asterisks indicate significant differences between mutant and WT as judged by a two-tailed, unpaired Student's t-test (\*, P<0.05; \*\*, P<0.01).

**A**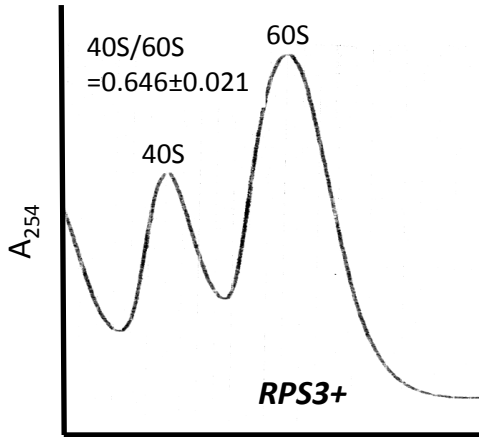**B**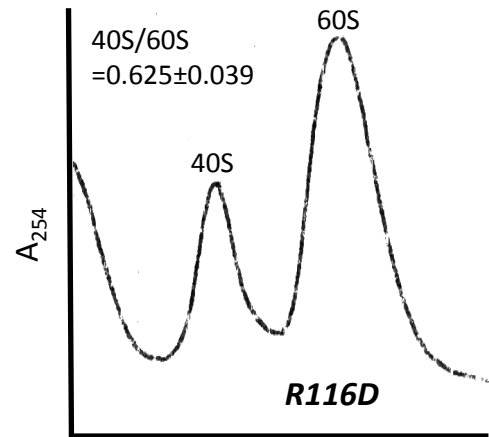**C**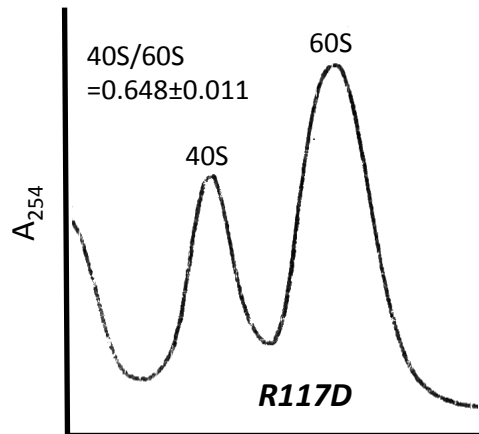**D**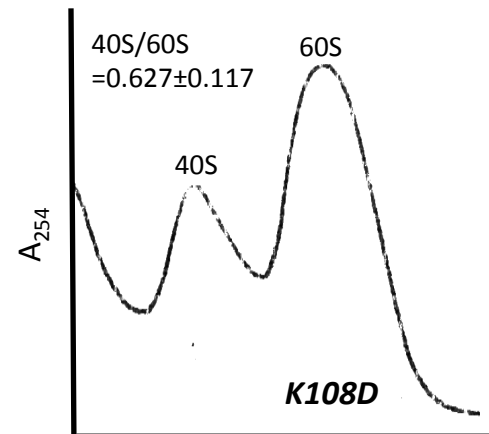**E**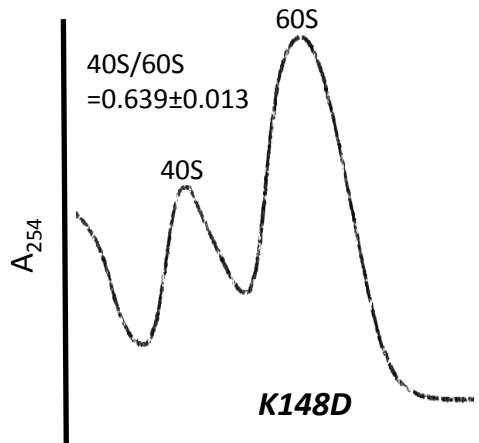**F**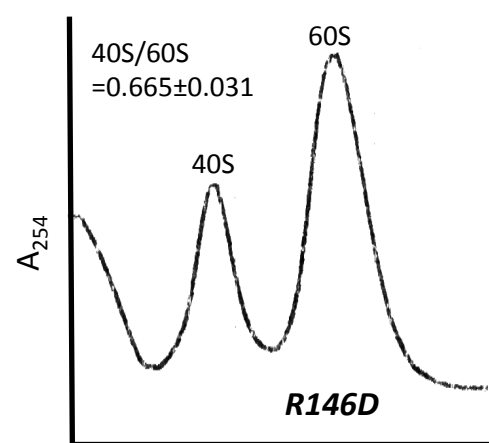

Supplement: pnas.1620569114.sapp.pdf [file pnas.1620569114.sapp.pdf]
